# Supplementary material for: Roles of Seed and Establishment Limitation in Determining Patterns of Afrotropical Tree Recruitment
Source: PLOS journal article supplement (doi:10.1371/journal.pone.0063330), 2013-05-14
Supplement: S1 (10.1371/journal.pone.0063330.s001) [file journal.pone.0063330.s001]

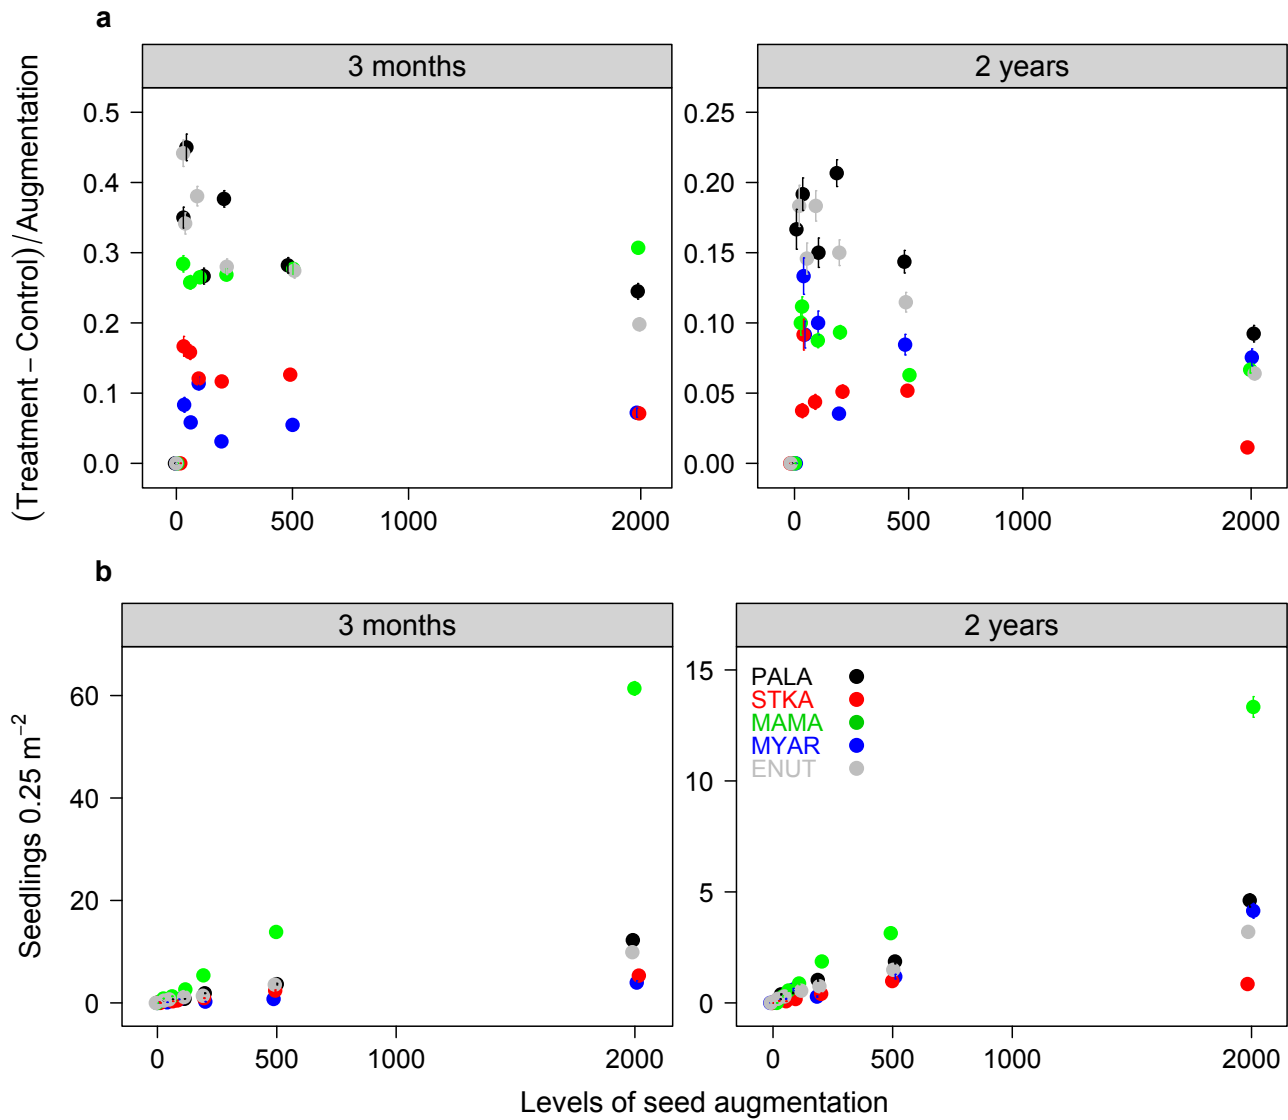

Figure S1. Species-specific estimates of (a) Per seed recruitment effect size,  $E$ , and (b) seedling densities at three months and 24 months after seeds were sowed at six levels. These relatively low effect sizes ( $E < 0.5$ ) indicate that this natural forest system is more strongly establishment limited than seed limited. The species include *Pancovia laurentii* (Pala), *Staudtia kamerunensis* (Stka), *Manilkara mabokeensis* (Mama), *Myrianthus arboreus* (Myar), and *Entandophragma utile* (Enut). Error bars are 95% confidence intervals. Weak seed limitation results in a gradual, but significant increase in total seedling numbers at very high seed densities.
